# Supplementary material
Source: Springer Nature journal article supplement (https://www.springermedizin.de/resource/supplementary/13012_2012_591_MOESM3_ESM.docx/9630352)
Supplement: MOESM3 [file 9630352]

| **Quality indicators** | | **% achieved** |
| --- | --- | --- |
| 1 | Record of smoking status in the last 15 months (process indicator) | 78.3 |
| 2 | Record of physical activity in the last 15 months (process indicator) | 51.6 |
| 3 | Record of Body Mass Index (BMI) or weight in the last 15 months (process indicator) | 32.8 |
| 4 | Record of blood pressure in the last 15 months (process indicator) | 91.6 |
| 5 | Record of cholesterol in the last 15 months (process indicator) | 81.3 |
| 6 | Record of blood glucose (random or fasting) in the last 15 months (process indicator) | 73.7 |
| 7 | Advice for smokers to quit smoking in the last 15 months (process indicator) | 68.1 |
| 8 | Advice for regular physical activity in the last 15 months (process indicator) | 38.6 |
| 9 | Advice for healthy diet in the last 15 months (process indicator) | 46.1 |
| 10 | Control of blood pressure level (mean blood pressure level of maximal 3 measures ≤ 140/90) (intermediate outcome indicator) | 46.7 |
| 11 | Control of total cholesterol level (≤ 5mmol/l) (intermediate outcome indicator) | 28.4 |
| **Outcome measure: Quality score** | |  |
| Percentage of overall achievement across 11 quality indicators (0-100%) | | **55.9** |
